# Supplementary material
Source: PubMed Central journal article supplement (PMC9132817)
Supplement: 103_2022_3543_MOESM1_ESM.pdf [file 103_2022_3543_MOESM1_ESM.pdf]

Onlinematerial zum Beitrag:

## **Notfallsituationen und Krankenhauszuweisungen in Pflegeeinrichtungen – ein Scoping Review zu Begleitumständen und versorgungsrelevanten Maßnahmen**

Carsten Bretschneider<sup>1\*</sup>, Juliane Poeck<sup>1\*</sup>, Antje Freytag<sup>1</sup>, Andreas Günther<sup>2</sup>, Nils Schneider<sup>3</sup>, Sven Schwabe<sup>3</sup>, Jutta Bleidorn<sup>1</sup>

\*Die Autor:innen CB und JP trugen gleichermaßen zu dieser Arbeit bei

<sup>1</sup>Institut für Allgemeinmedizin, Universitätsklinikum Jena, Jena, Deutschland

<sup>2</sup>Fachbereich Feuerwehr, Braunschweig, Deutschland

<sup>3</sup>Institut für Allgemeinmedizin und Palliativmedizin, Medizinische Hochschule Hannover, Hannover, Deutschland

### **Korrespondenzadresse**

Juliane Poeck M.Sc.

Universitätsklinikum Jena

Institut für Allgemeinmedizin

Bachstraße 18

07743 Jena

Deutschland

juliane.poeck@med.uni-jena.de

### **Inhalt:**

Suchsyntax für die Artikelrecherche in den Datenbanken PubMed und CINAHL

## Suchsyntax für die Artikelrecherche in den Datenbanken PubMed und CINAHL

("Nursing Homes"[Mesh] OR "Homes for the Aged"[Mesh]) AND ("Emergency Medicine"[Mesh] OR "Emergency Treatment"[Mesh] OR "Emergencies"[Mesh] OR emergenc\*[Title/Abstract] OR patient Transfer\*[Title/Abstract] OR "Patient Transfer"[Mesh] OR hospital admission\*[Title/Abstract] OR patient admission\*[Title/Abstract] OR "Advance Directives"[Mesh] OR "Emergency Medical Services"[Mesh] OR "Patient Readmission"[Mesh] OR avoidable hospital\*[Title/Abstract] OR "Patient Admission"[Mesh] OR unnecessary transfer\*[Title/Abstract] OR unnecessary hospital\*[Title/Abstract] OR acute illness\*[Title/Abstract])
